# Supplementary material
Source: publisher figshare collection journal article supplement (https://acs.figshare.com/ndownloader/files/31804285)
Supplement: Supplementary file 1 [file 31804285]

## Supporting Information

### Transparent flexible electromagnetic interference shielding film using ITO nano-branches by internal scattering

Youngho Kim<sup>†, ‡</sup>, Seok-Ki Hyeong<sup>†, ‡, §</sup>, Yeunji Choi<sup>†</sup>, Seoung-Ki Lee<sup>||</sup>, Jae-Hyun Lee<sup>\*, †, ‡</sup>, and

Hak Ki Yu<sup>\*, †, ‡</sup>

<sup>†</sup> Department of Materials Science and Engineering, Ajou University, Suwon 16499, Republic of Korea

<sup>‡</sup> Department of Energy Systems Research, Ajou University, Suwon 16499, Republic of Korea

<sup>§</sup> Functional Composite Materials Research Center, Institute of Advanced Composite Materials, Korea Institute of Science and Technology (KIST), 92 Chudong-ro, Bongdong-eup, Wanju-gun, Jeonbuk-do, 55324, Republic of Korea

<sup>||</sup> School of Materials Science and Engineering, Pusan National University, 2, Busandaehak-ro-63-beon-gil, Geumjeong-gu, Busan 46241, Republic of Korea

#### ■ AUTHOR INFORMATION

##### Corresponding Authors

\*E-mail: [hakkiyu@ajou.ac.kr](mailto:hakkiyu@ajou.ac.kr) (H. K. Yu).

\*E-mail: [jaehyunlee@ajou.ac.k](mailto:jaehyunlee@ajou.ac.k) (J. -H. Lee).

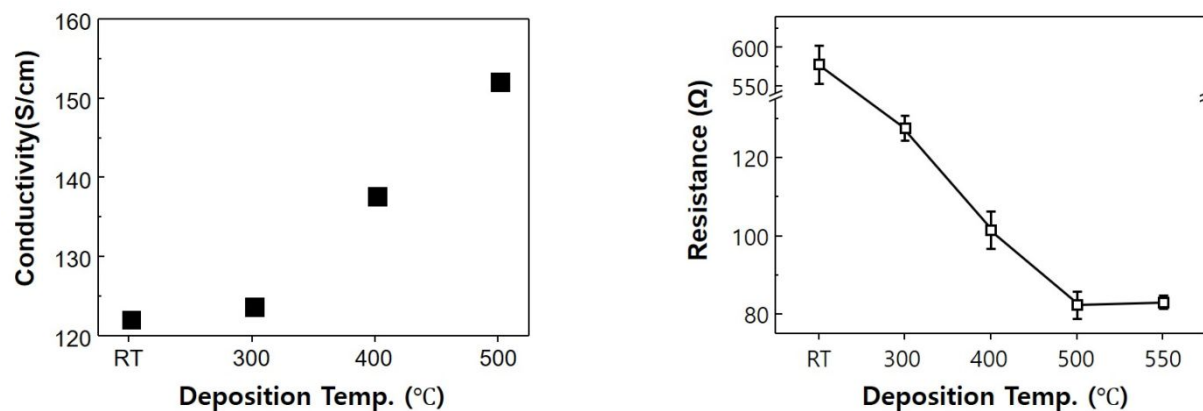

**Figure S1.** Electrical conductivity and resistance of ITO nano-branches grown on glass according to substrate temperature.

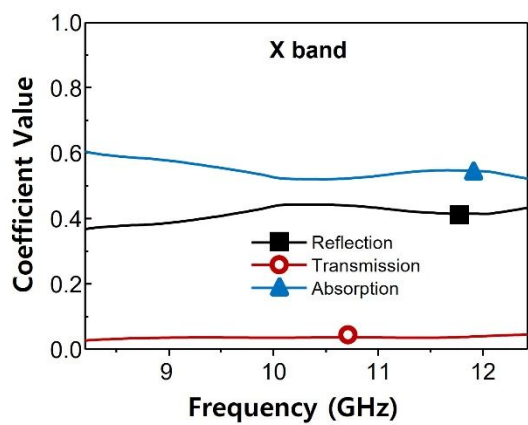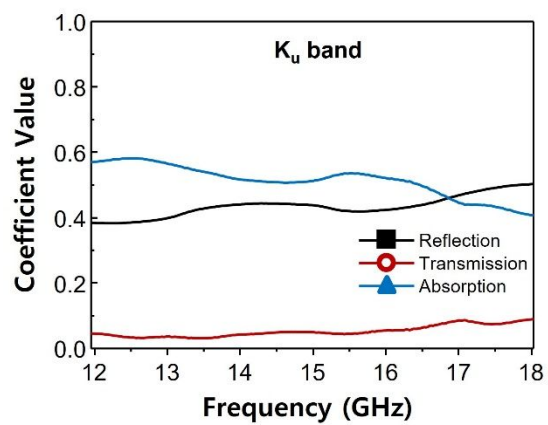

**Figure S2.** Transmission, Absorption and Reflection Coefficient of ITO nano-branch on polyimide (X band and K<sub>u</sub> band response).

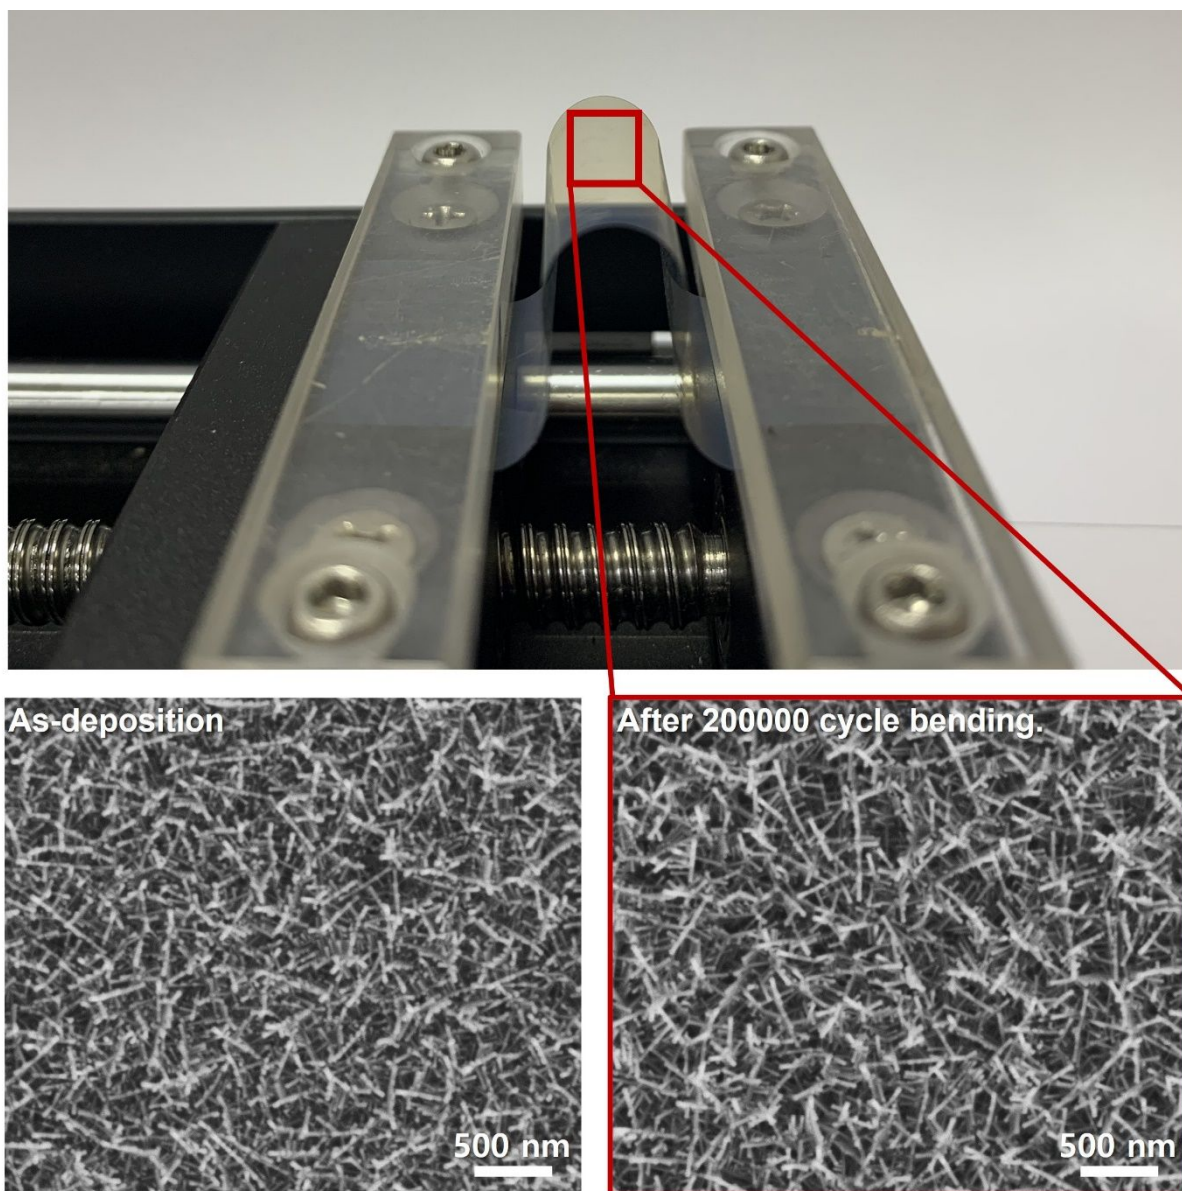

**Figure S3.** Top view SEM image of ITO nano-branches growth on polyimide at 400 °C before and after 200000 bending.

**Table S1.** the resistance changes of TF-EMIS film by ITO nano-branches on Polyimide film and commercial ITO coated PET film

|                                            | As-position     | After 200000 cycle bending | $(R-R_0)/R_0$ |
|--------------------------------------------|-----------------|----------------------------|---------------|
| TF-EMIS film by ITO nano-branch on PI film | 144.23 $\Omega$ | 162.51 $\Omega$            | 0.13          |

  

|                                | As-position     | After 10000 cycle bending | $(R-R_0)/R_0$ |
|--------------------------------|-----------------|---------------------------|---------------|
| Commercial ITO coated PET film | 2.34 k $\Omega$ | 10.18 k $\Omega$          | 3.39          |

**Supporting information movies;** i) experimental process ii) Wi-fi test, and iii) LTE test
